# Supplementary material for: Nitrogen-doped holey graphene foams for high-performance lithium storage
Source: Royal Society of Chemistry journal article supplement (doi:10.1039/c5ra19313c), 2015-01-01
Supplement: c5ra19313c1.pdf [file c5ra19313c1.pdf]

## Nitrogen-Doped Holey Graphene Foams for High-Performance Lithium Storage

Jianguang Sun, Lan Wang, Ranran Song, Shubin Yang\*

*Key Laboratory of Aerospace Advanced Materials and Performance of Ministry of Education, School of Materials Science and Engineering, Beihang University, 100191, Beijing, China*

*\*Email: yangshubin@buaa.edu.cn*

### 1. Experimental of Absorbance of methylene blue (MB)

The absorption value at 310 nm of methylene blue (MB) ethanol solution was used to evaluate the macroporous surface areas of NHGFs<sup>1</sup> through the UV-vis spectra. Specifically, 0.55 cm<sup>2</sup> of as-prepared Holey graphene foams were added into 0.1 mg mL<sup>-1</sup> MB ethanol solution and kept for 10 days at room temperature to allow adsorption of MB on the surface of holey graphene foams. UV-vis spectra adsorption experiments were recorded after this long-time absorbance and pure MB solution. The surface area can be calculated through the variation of the absorption value at 310 nm of MB ethanol solution. 1 mg of adsorbed MB represents 2.54 m<sup>2</sup> of covered surface area<sup>2</sup>.

### 2. Calculation of diffusion coefficient (D) of lithium

As shown in Figure 6b in main text, Warburg impedance coefficient,  $\sigma_w$  can be easily calculated. And then, the diffusion coefficient (D) of lithium could be calculated by using equation (1):

$$D=R^2T^2/2A^2n^4F^4C^2\sigma_w^2 \quad (1)$$

Where  $R$  is the gas constant,  $F$  is the Faraday constant,  $T$  is the temperature,  $A$  is the surface area,  $n$  is the number of moles of charge per ion, and  $C$  is the maximum ion concentration, the value of  $\sigma_w$  is shown in Table S1.

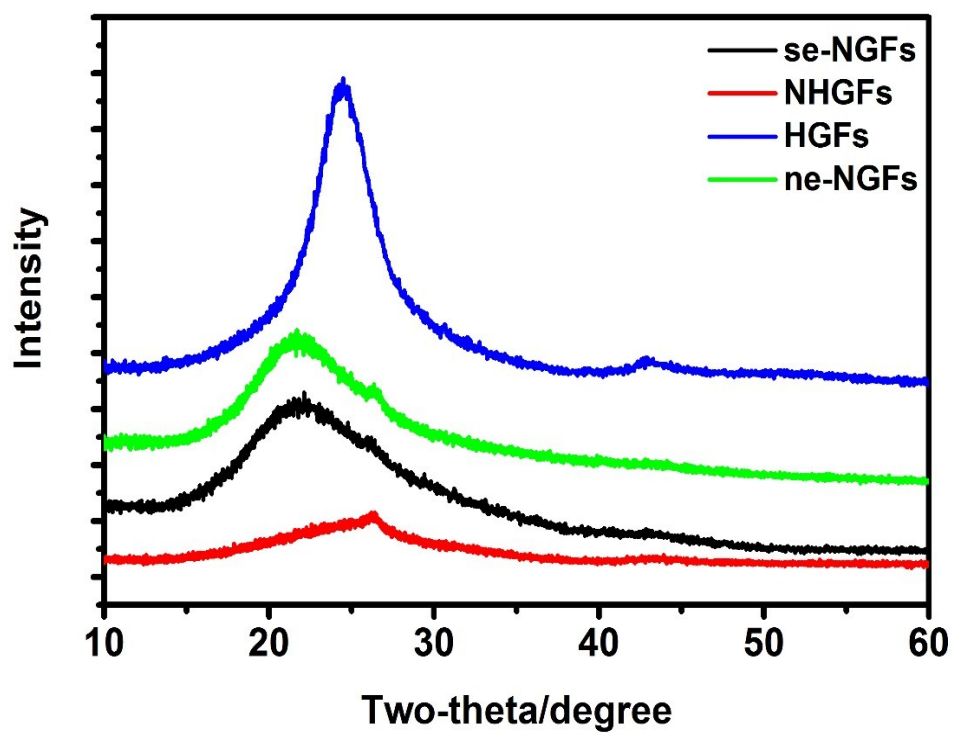

Figure S1. XRD patterns of NHGFs, se-NGFs, ne-NGFs, HGFs.

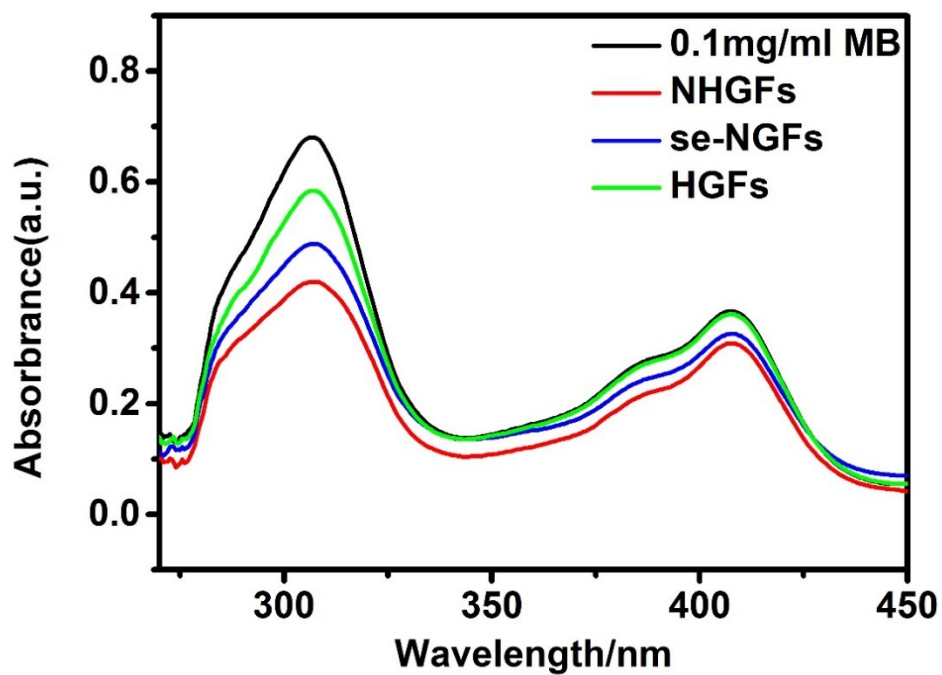

**Figure S2.** UV-vis spectra of NHGFs, as compared to se-NGFs and HGFs recorded after 10 days until absorption equilibrium during MB adsorption experiments.

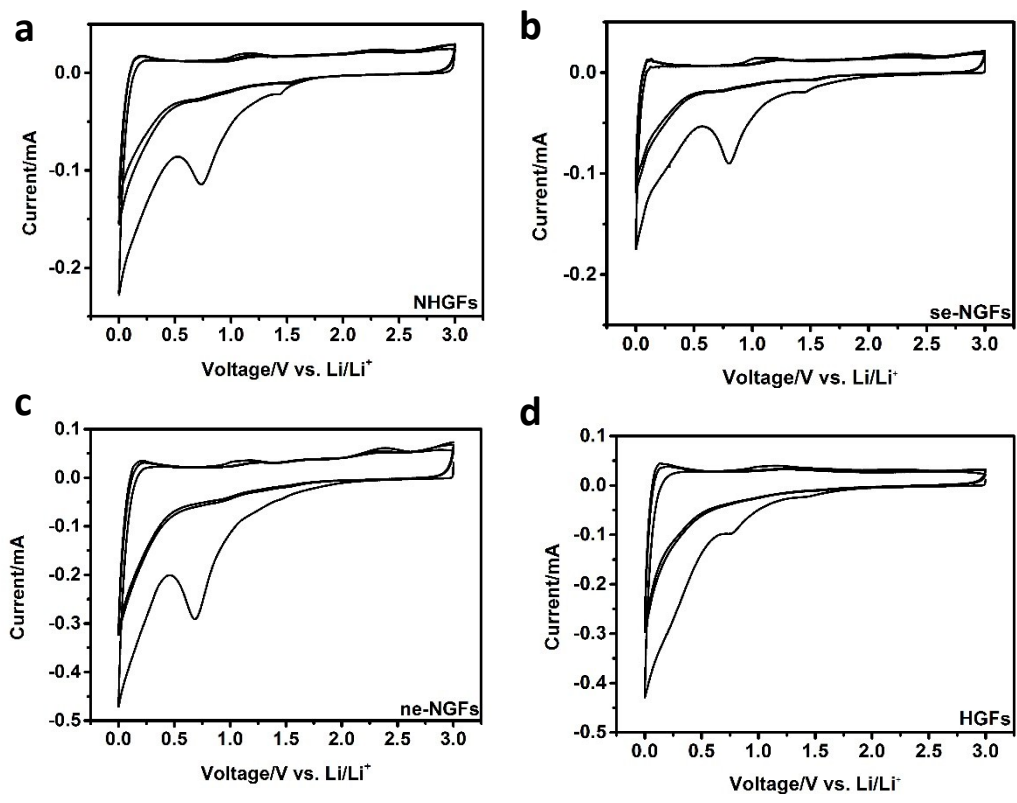

**Figure S3.** Typical cyclic voltammograms of (a) NHGFs, (b) se-NGFs, (c) ne-NGFs and (d) NGFs.

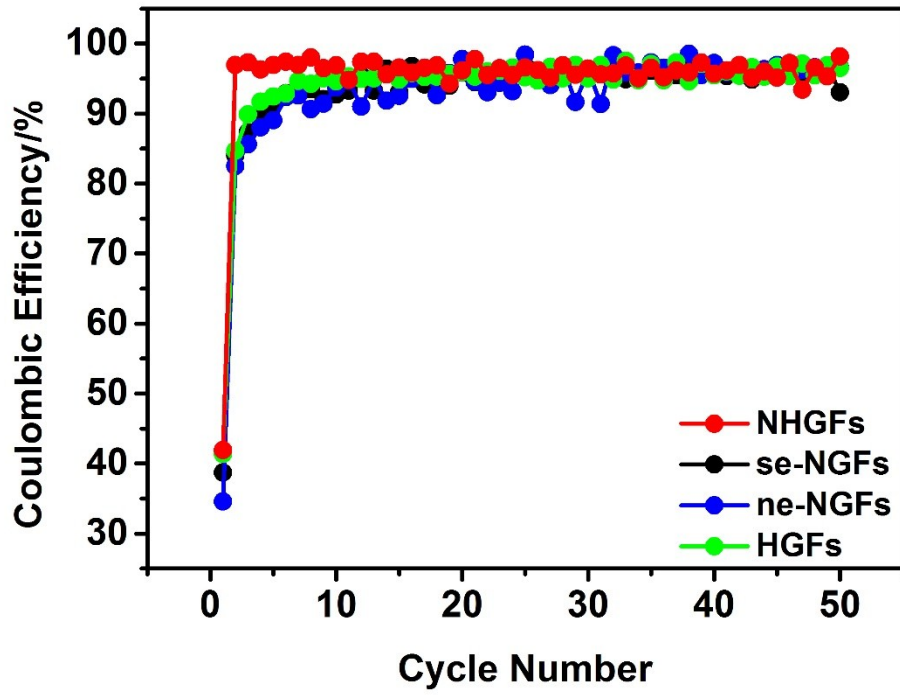

**Figure S4.** Coulombic efficiency of nitrogen-doped holey graphene foams at 0.1 C.

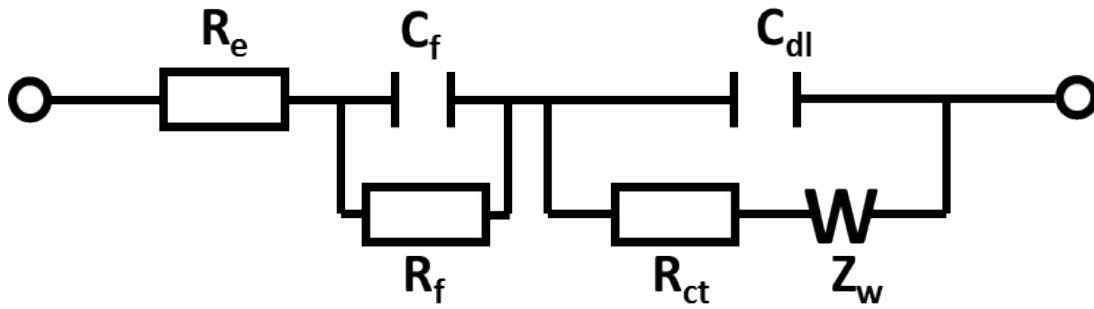

**Figure S5.** Randles equivalent circuit for NHGFs electrode/electrolyte interface.  $R_e$  is the electrolyte resistance, and  $C_f$  and  $R_f$  are the capacitance and resistance of the surface film formed on the electrodes, respectively.  $C_{dl}$  and  $R_{ct}$  are the double-layer capacitance and charge-transfer resistance, respectively,  $Z_w$  is the Warburg impedance related to the diffusion of lithium ions into the bulk electrodes.

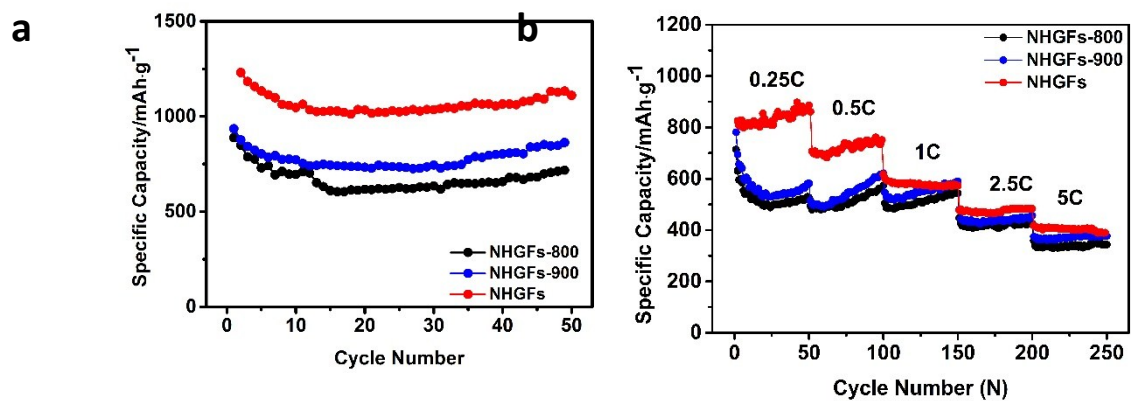

**Figure S6.** a) Cycle performances of NHGFs-800, NHGFs-900 and NHGFs at a current rate of 0.1C. b) Comparison of rate capacities of NHGFs-800, NHGFs-900 and NHGFs.

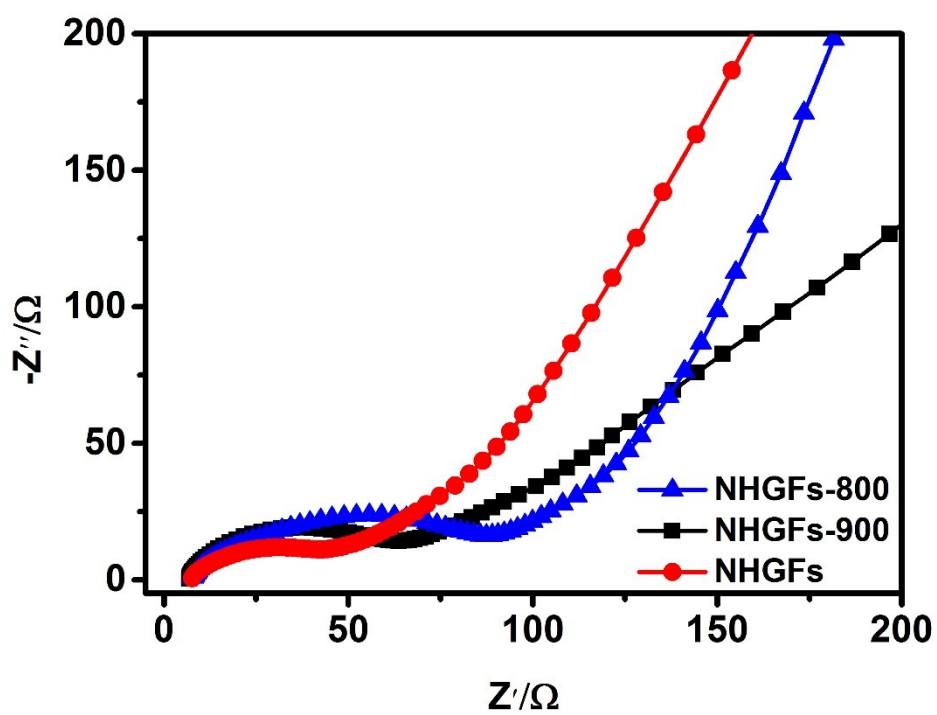

**Figure S7.** Nyquist plots of NHGFs-800, NHGFs-900 and NHGFs.



**Table S1.** Warburg impedane coefficient,  $\sigma_w$ , derived from the slope of each line in Fig. 6 in main text.

| Samples | $\sigma_w$ |
|---------|------------|
| NHGFs   | 38.3       |
| se-NGFs | 40.1       |
| ne-NGFs | 64.2       |
| HGFs    | 47.4       |

**Table S2.** The kinetic parameters of NHGFs, se-NGFs, ne-NGFs and NGFs.

| Samples   | $R_e$ (Ohms) | $R_f$ (Ohms) | $R_{ct}$ (Ohms) |
|-----------|--------------|--------------|-----------------|
| NHGFs     | 4.0          | 9.4          | 26.7            |
| se-NGFs   | 5.5          | 11.1         | 32.0            |
| ne-NGFs   | 9.3          | 14.0         | 45.8            |
| HGFs      | 5.3          | 12.9         | 39.4            |
| NHGFs-900 | 7.2          | 10.8         | 34.5            |
| NHGFs-800 | 8.5          | 16.2         | 43.5            |

## References

- 1 J. Duan, S. Chen, M. Jaroniec and S. Z. Qiao, *ACS Nano*, 2015, **9**, 931-940.
- 2 M. J. McAllister, J. L. Li, D. H. Adamson, H. C. Schniepp, A. A. Abdala, J. Liu, M. Herrera-Alonso, D. L. Milius, R. Car, R. K. Prud'homme and I. A. Aksay, *Chem. Mater.*, 2007, **19**, 4396-4404.
